# Supplementary material for: Leaf Carbohydrate Metabolism Variation Caused by Late Planting in Rapeseed (Brassica napus L.) at Reproductive Stage
Source: MDPI journal article supplement (doi:10.3390/plants11131696), 2022-06-27
Supplement: s1 [file s1]

Supplementary Table S1. **Mean value of each physiological trait in 2019 and 2020.** The different lowercase letters in each column indicate significant difference at  $P < 0.05$  according to Duncan's test.

| Planting date                               | 2019                |       |        |        |        |        |       | 2020  |       |        |       |       |        |        |
|---------------------------------------------|---------------------|-------|--------|--------|--------|--------|-------|-------|-------|--------|-------|-------|--------|--------|
|                                             | Days after anthesis |       |        |        |        |        |       |       |       |        |       |       |        |        |
|                                             | 0                   | 7     | 14     | 21     | 28     | 35     | 42    | 0     | 7     | 14     | 21    | 28    | 35     | 42     |
| Leaf dry matter (g plant <sup>-1</sup> )    |                     |       |        |        |        |        |       |       |       |        |       |       |        |        |
| 15 September                                | 7.11a               | 5.49b | 4.77c  | 3.93ab | 2.25bc | 1.13b  | 0.61b | 7.85a | 7.49b | 6.02c  | 3.50b | 2.87b | 2.05ab | 0.62b  |
| 1 October                                   | 7.90a               | 8.78a | 9.23a  | 5.17a  | 3.62a  | 2.31a  | 0.75a | 8.57a | 8.95a | 10.71a | 6.13a | 5.76a | 2.83a  | 0.68ab |
| 15 October                                  | 5.78b               | 5.03b | 6.88b  | 3.79b  | 2.73b  | 1.83ab | 0.86a | 5.14b | 6.23c | 7.67b  | 3.88b | 3.41b | 2.34a  | 0.83a  |
| 30 October                                  | 0.85c               | 2.11c | 6.22bc | 1.75c  | 1.55c  | 1.21ab | 0.76a | 2.85c | 3.43d | 7.05bc | 1.78c | 1.54c | 1.07b  | 0.67ab |
| Chlorophyll content (mg g <sup>-1</sup> FW) |                     |       |        |        |        |        |       |       |       |        |       |       |        |        |
| 15 September                                | 1.16a               | 1.25a | 1.23b  | 1.12b  | 0.89b  | 0.65c  | 0.58c | 1.28a | 1.33a | 1.25b  | 1.26b | 0.99b | 0.72c  | 0.62c  |
| 1 October                                   | 1.16a               | 1.32a | 1.44a  | 1.29a  | 0.85b  | 0.65c  | 0.56c | 1.11b | 1.32a | 1.57a  | 1.49a | 0.94b | 0.59d  | 0.67c  |
| 15 October                                  | 0.93b               | 1.13b | 1.22b  | 1.18ab | 0.84b  | 0.83b  | 0.80b | 0.82c | 1.24a | 1.21b  | 1.10b | 0.98b | 0.85b  | 0.81b  |
| 30 October                                  | 0.84b               | 0.75c | 1.13c  | 1.13b  | 1.07a  | 0.94a  | 1.02a | 0.83c | 0.85b | 1.24b  | 1.13b | 1.27a | 1.09a  | 1.01a  |

| Total soluble sugar content (mg g <sup>-1</sup> DW)                        |            |        |        |       |        |        |        |        |        |        |        |       |        |        |
|----------------------------------------------------------------------------|------------|--------|--------|-------|--------|--------|--------|--------|--------|--------|--------|-------|--------|--------|
| 15 September                                                               | 28.1a      | 16.2a  | 12.1c  | 12.4b | 9.2d   | 8.3d   | 5.1d   | 30.0a  | 16.5a  | 13.3c  | 14.4c  | 9.3d  | 11.4c  | 9.5c   |
| 1 October                                                                  | 27.8a      | 15.9a  | 13.9b  | 16.0a | 13.2c  | 10.7c  | 6.9c   | 29.5a  | 19.2a  | 18.7a  | 15.0bc | 13.6c | 12.6c  | 10.6c  |
| 15 October                                                                 | 13.6b      | 14.9a  | 15.7a  | 17.1a | 14.6b  | 13.8b  | 12.8b  | 13.0b  | 10.7b  | 16.1b  | 18.1a  | 16.9b | 17.2b  | 14.5b  |
| 30 October                                                                 | 9.9c       | 8.3b   | 15.1ab | 15.8a | 16.5a  | 17.4a  | 15.5a  | 8.3c   | 7.4c   | 11.1c  | 16.5ab | 18.5a | 19.5a  | 20.2a  |
| Acid invertase activity (nmol h <sup>-1</sup> mg <sup>-1</sup> protein)    |            |        |        |       |        |        |        |        |        |        |        |       |        |        |
| 15 September                                                               | 302.4<br>b | 185.9b | 89.0a  | 57.8b | 75.6ab | 58.4a  | 62.1ab | 218.6c | 201.9b | 87.9a  | 44.8b  | 32.9b | 41.7c  | 67.4a  |
| 1 October                                                                  | 389.8a     | 223.1a | 97.3a  | 90.1a | 63.5b  | 45.6b  | 69.3a  | 338.5a | 246.5a | 89.9a  | 39.2b  | 62.7a | 29.4d  | 71.4a  |
| 15 October                                                                 | 246.0c     | 184.6b | 50.2b  | 61.1b | 31.9c  | 44.4b  | 45.5c  | 263.5b | 145.4c | 29.0c  | 43.4b  | 38.1b | 102.8a | 48.2b  |
| 30 October                                                                 | 234.9c     | 126.3c | 56.1b  | 55.8b | 78.8a  | 59.5a  | 49.2bc | 217.2c | 94.4d  | 54.9b  | 58.2a  | 57.9a | 63.1b  | 41.8c  |
| Neutral invertase activity (nmol h <sup>-1</sup> mg <sup>-1</sup> protein) |            |        |        |       |        |        |        |        |        |        |        |       |        |        |
| 15 September                                                               | 57.6b      | 48.9c  | 108.9a | 54.2a | 49.8a  | 54.9a  | 104.4a | 34.9c  | 74.5b  | 101.4a | 50.2b  | 41.7c | 57.6a  | 118.8a |
| 1 October                                                                  | 58.0b      | 97.7a  | 91.8b  | 42.7b | 40.3b  | 48.8ab | 81.0b  | 53.9b  | 96.2a  | 92.7ab | 58.5a  | 68.7a | 48.5b  | 96.6b  |
| 15 October                                                                 | 75.6a      | 91.8a  | 83.9b  | 58.7a | 473a   | 44.1b  | 64.5c  | 50.6b  | 78.9b  | 88.9b  | 46.7b  | 55.1b | 20.0c  | 70.4c  |
| 30 October                                                                 | 78.6a      | 63.7b  | 44.2c  | 39.8b | 27.9c  | 30.8c  | 57.1c  | 72.5a  | 47.8c  | 72.5c  | 48.5b  | 23.9d | 23.8c  | 65.1c  |

| Sucrose phosphate synthase activity (nmol h <sup>-1</sup> mg <sup>-1</sup> protein) |            |        |        |        |        |        |        |        |        |        |         |         |        |         |
|-------------------------------------------------------------------------------------|------------|--------|--------|--------|--------|--------|--------|--------|--------|--------|---------|---------|--------|---------|
| 15 September                                                                        | 239.4a     | 125.1b | 127.2c | 143.6b | 145.7b | 121.3b | 100.3c | 133.1b | 215.0a | 128.9b | 106.6c  | 130.1ab | 128.0b | 74.1c   |
| 1 October                                                                           | 138.4c     | 184.6a | 169.2a | 128.2b | 129.8c | 113.1b | 81.4d  | 97.6c  | 97.1c  | 154.3a | 125.6b  | 129.7b  | 104.5c | 80.3c   |
| 15 October                                                                          | 111.7<br>d | 105.8b | 147.7b | 167.9a | 163.6a | 141.8a | 127.4a | 121.0b | 123.3b | 132.3b | 149.4a  | 163.3a  | 156.2a | 121.8a  |
| 30 October                                                                          | 215.8<br>b | 190.6a | 112.1c | 75.2c  | 75.3d  | 107.0b | 115.4b | 175.0a | 104.3c | 99.2c  | 68.9d   | 48.9c   | 54.8d  | 97.8b   |
| Sucrose synthase activity (nmol h <sup>-1</sup> mg <sup>-1</sup> protein)           |            |        |        |        |        |        |        |        |        |        |         |         |        |         |
| 15 September                                                                        | 345.8<br>b | 249.2b | 168.0d | 262.2d | 296.4d | 387.1c | 274.2a | 164.0c | 202.2c | 166.0d | 204.5c  | 320.3d  | 363.1a | 291.9a  |
| 1 October                                                                           | 293.7c     | 225.0c | 247.2c | 283.8c | 321.5c | 468.0a | 194.4c | 220.9b | 253.3b | 332.8a | 273.3b  | 484.6a  | 262.0c | 228.1b  |
| 15 October                                                                          | 249.0<br>d | 216.5c | 300.9a | 331.0a | 407.3a | 334.3d | 245.6b | 307.3a | 195.4c | 274.4b | 329.8a  | 360.4c  | 274.0c | 251.1ab |
| 30 October                                                                          | 405.1a     | 361.5a | 277.3b | 309.0b | 357.3b | 437.7b | 291.9a | 288.8a | 329.2a | 248.9c | 298.6ab | 386.1b  | 329.7b | 272.2a  |

| Starch phosphorylase activity (nmol h <sup>-1</sup> mg <sup>-1</sup> protein)          |        |        |        |        |         |        |        |        |        |        |        |        |        |        |
|----------------------------------------------------------------------------------------|--------|--------|--------|--------|---------|--------|--------|--------|--------|--------|--------|--------|--------|--------|
| 15 September                                                                           | 47.8a  | 19.8d  | 81.8a  | 79.2b  | 90.8b   | 14.8a  | 9.1bc  | 56.5a  | 26.6c  | 39.7a  | 135.8b | 146.4c | 10.6c  | 10.0ab |
| 1 October                                                                              | 42.4b  | 44.1a  | 44.4c  | 102.5a | 149.4ab | 13.2ab | 11.4a  | 32.2c  | 23.6c  | 25.4c  | 95.3c  | 182.9b | 19.7a  | 11.4a  |
| 15 October                                                                             | 12.4c  | 33.1b  | 24.6d  | 98.1a  | 231.0a  | 10.8c  | 10.3ab | 46.3b  | 40.7b  | 26.9c  | 150.6a | 223.1a | 15.1b  | 8.2b   |
| 30 October                                                                             | 46.3a  | 28.3c  | 52.1b  | 41.6c  | 96.1b   | 11.5bc | 8.0c   | 18.7d  | 80.8a  | 31.3b  | 94.5c  | 84.8d  | 12.7bc | 10.5ab |
| ADP-glucose pyrophosphorylase activity (nmol h <sup>-1</sup> mg <sup>-1</sup> protein) |        |        |        |        |         |        |        |        |        |        |        |        |        |        |
| 15 September                                                                           | 122.8a | 135.6b | 94.9a  | 74.4c  | 53.6d   | 53.6c  | 63.6d  | 121.1a | 158.2b | 119.4a | 85.7b  | 51.2d  | 54.2d  | 50.8d  |
| 1 October                                                                              | 118.0a | 160.6a | 91.5ab | 82.5bc | 61.8c   | 57.7c  | 67.8c  | 103.2b | 181.7a | 85.0c  | 88.6b  | 68.4c  | 63.8c  | 58.9c  |
| 15 October                                                                             | 49.6b  | 80.9c  | 87.7b  | 97.3a  | 135.4a  | 111.9a | 113.9a | 38.0c  | 65.8c  | 90.0b  | 101.9a | 125.1a | 105.8a | 103.3a |
| 30 October                                                                             | 32.6c  | 46.9d  | 76.2c  | 84.4b  | 116.0b  | 104.5b | 84.8b  | 37.8c  | 57.1d  | 71.8d  | 87.9b  | 107.8b | 97.7b  | 96.4b  |

Supplementary Figure S1

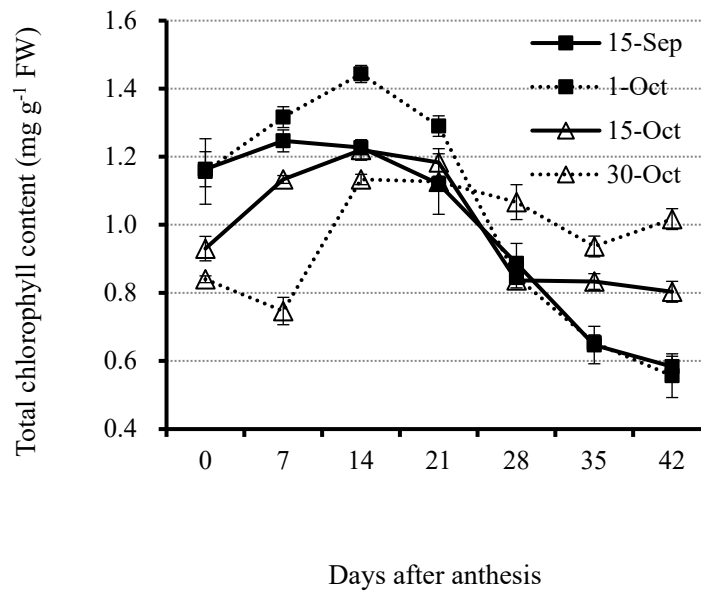

Leaf total chlorophyll content from anthesis with a 7 d interval under four planting dates—early, optimal, late, and very late (15 September, 1 October, 15 October, and 30 October)—in 2019. Bars of each value are standard error.

Supplementary Figure S2

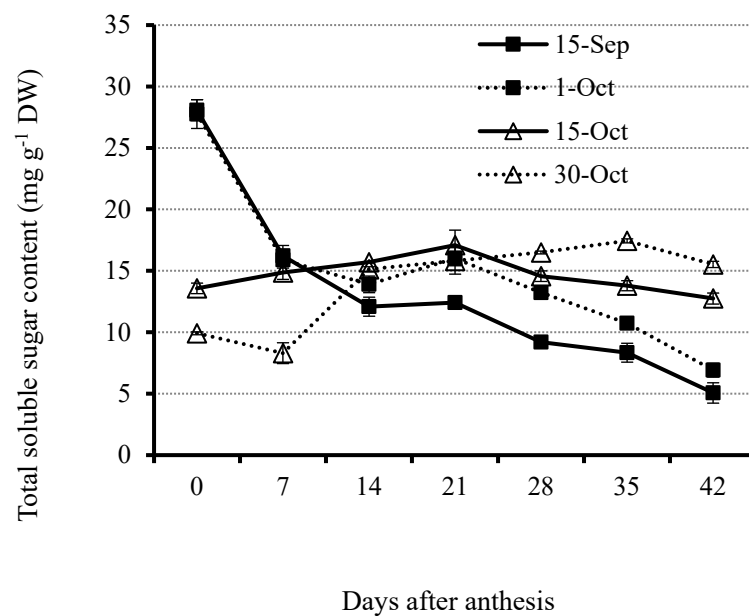

Leaf total soluble sugar content from anthesis with a 7 d interval under four planting dates—early, optimal, late, and very late (15 September, 1 October, 15 October, and 30 October)—in 2019. Bars of each value are standard error.

Supplementary Figure S3

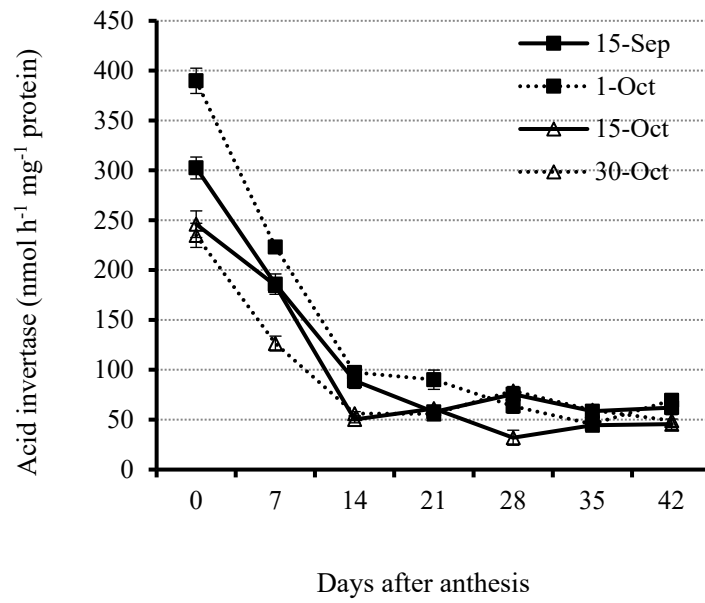

Leaf acid invertase activity from anthesis with a 7 d interval under four planting dates—early, optimal, late, and very late (15 September, 1 October, 15 October, and 30 October)—in 2019. Bars of each value are standard error.

Supplementary Figure S4

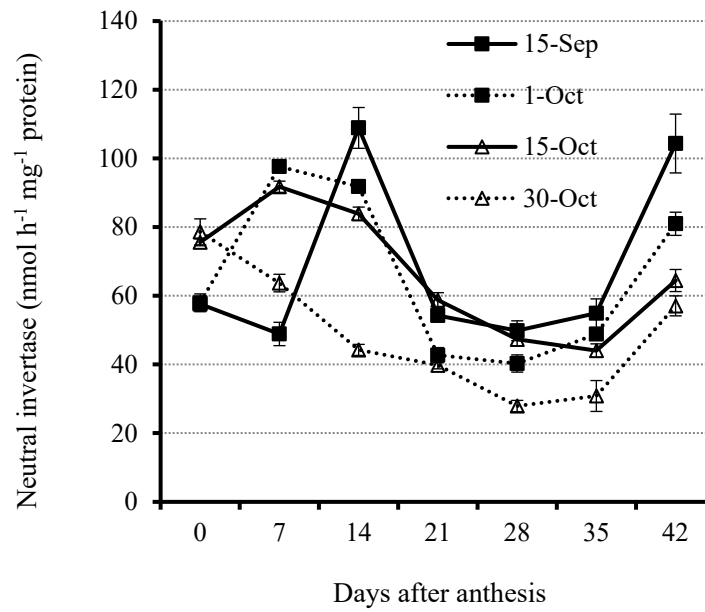

Leaf neutral invertase activity from anthesis with a 7 d interval under four planting dates—early, optimal, late, and very late (15 September, 1 October, 15 October, and 30 October)—in 2019. Bars of each value are standard error.



Supplementary Figure S5

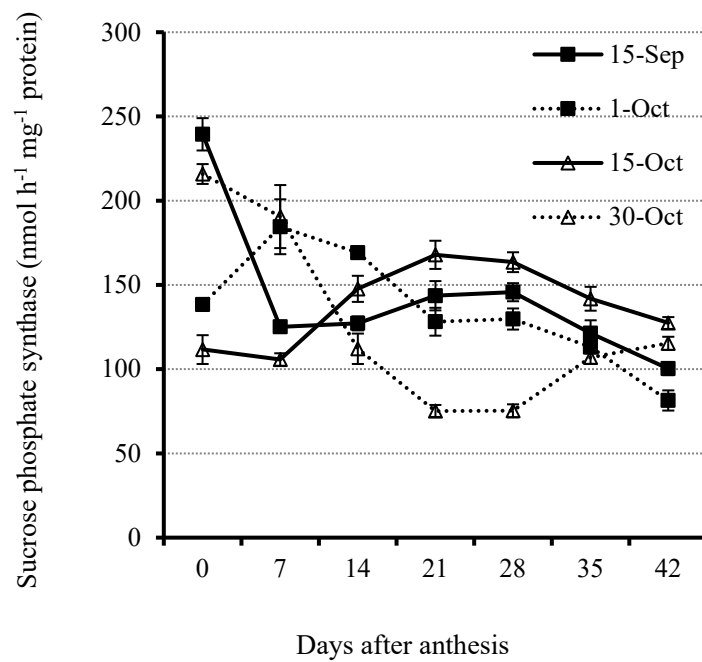

Leaf sucrose phosphate synthase activity from anthesis with a 7 d interval under four planting dates—early, optimal, late, and very late (15 September, 1 October, 15 October, and 30 October)—in 2019. Bars of each value are standard error.

Supplementary Figure S6

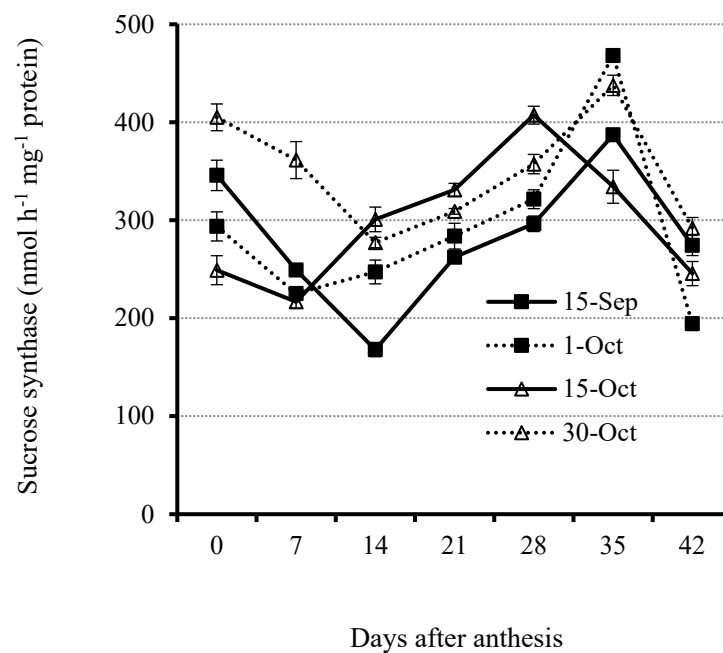

Leaf sucrose synthase activity from anthesis with a 7 d interval under four planting dates—early, optimal, late, and very late (15 September, 1 October, 15 October, and 30 October)—in 2019. Bars of each value are standard error.

Supplementary Figure S7

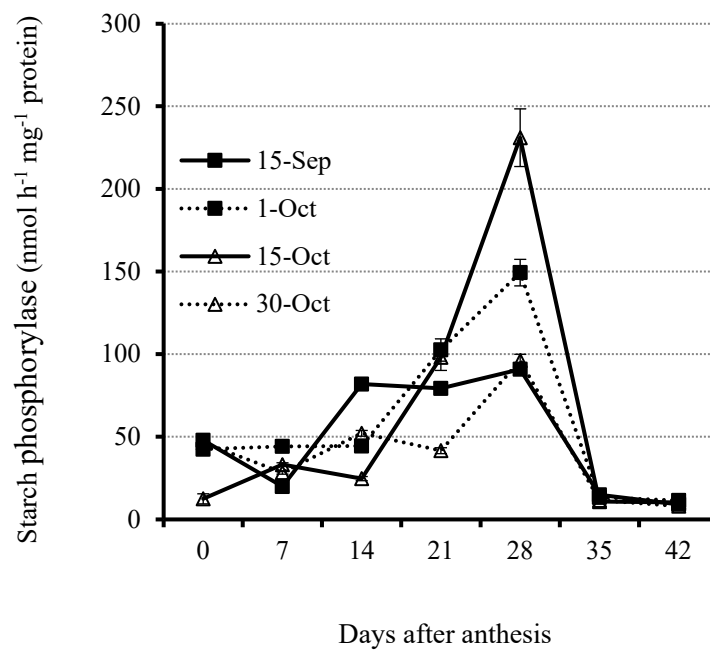

Leaf starch phosphorylase activity from anthesis with a 7 d interval under four planting dates—early, optimal, late, and very late (15 September, 1 October, 15 October, and 30 October)—in 2019. Bars of each value are standard error.

Supplementary Figure S8

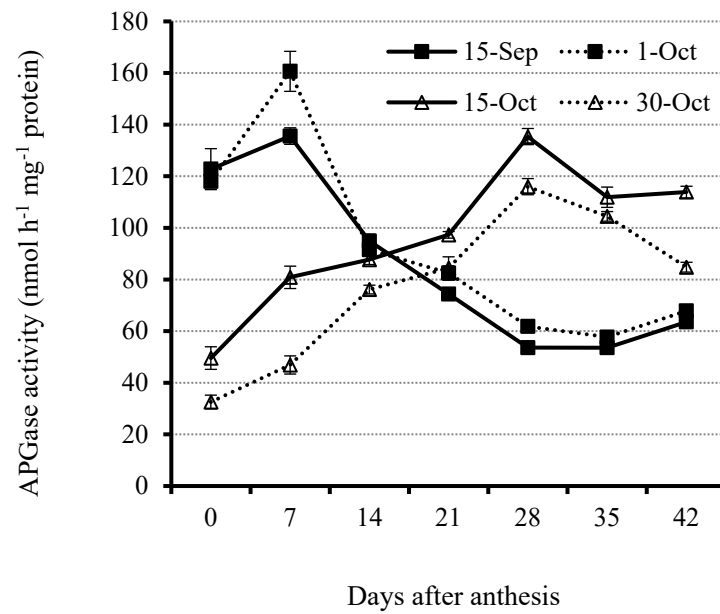

Leaf ADP-glucose pyrophosphorylase activity from anthesis with a 7 d interval under four planting dates—early, optimal, late, and very late (15 September, 1 October, 15 October, and 30 October)—in 2019. Bars of each value are standard error.
